# Supplementary material for: Cohort profile: design, sociodemographic characteristics, chronic disease risk factors, and baseline hypertension and diabetes care cascades of the open, prospective Community-Based chronic disease Care Lesotho (ComBaCaL) cohort
Source: bioRxiv or medRxiv preprint supplement (doi:10.1101/2024.09.18.24313892), 2024-09-19
Supplement: Supplementary file [file media-1.pdf]

| <b>Characteristic</b>                                           | <b>N = 5,008</b>  |
|-----------------------------------------------------------------|-------------------|
| <b>District</b>                                                 |                   |
| Butha-Buthe                                                     | 2,486 (49.6%)     |
| Mokhotlong                                                      | 2,522 (50.4%)     |
| <b>Number of household members, median (IQR)</b>                | 3 (2, 4)          |
| <b>International Wealth Index, median (IQR)</b>                 | 26 (17, 36)       |
| <b>Monthly household income (USD), median (IQR)<sup>1</sup></b> | 42.4 (18.6, 63.6) |
| Unknown                                                         | 7                 |
| <b>Main source of household income</b>                          |                   |
| Salary/wages <sup>2</sup>                                       | 1,289 (25.7%)     |
| Informal business (e.g. street vendor)                          | 1,109 (22.1%)     |
| Formal business (e.g. retail trade)                             | 37 (0.7%)         |
| Farming                                                         | 1,213 (24.2%)     |
| Rentals / interest                                              | 61 (1.2%)         |
| Grants / pension                                                | 1,109 (22.1%)     |
| Refused to say                                                  | 190 (3.8%)        |
| <b>Access to health facility</b>                                |                   |
| Easy access                                                     | 2,460 (49.1%)     |
| Hard access <sup>3</sup>                                        | 2,548 (50.9%)     |
| <b>Difficulties accessing health care<sup>4</sup></b>           | 1,120 (22.4%)     |
| <b>Difficulties accessing medications<sup>5</sup></b>           | 821 (16.4%)       |
| <b>Household Food Insecurity Access category</b>                |                   |
| Food secure                                                     | 2,385 (47.6%)     |
| Mildly food insecure                                            | 167 (3.3%)        |
| Moderately food insecure                                        | 965 (19.3%)       |
| Severely food insecure                                          | 1,489 (29.7%)     |
| Unknown                                                         | 2                 |
| <b>Drinking water</b>                                           |                   |
| Running (piped) water inside the dwelling                       | 15 (0.3%)         |
| Running (piped) water outside dwelling but inside yard          | 64 (1.3%)         |
| Neighbor's tap                                                  | 43 (0.9%)         |
| Public / community tap                                          | 4,075 (81.4%)     |
| Borehole                                                        | 548 (10.9%)       |
| Dam/ river                                                      | 216 (4.3%)        |
| Rainwater tank                                                  | 41 (0.8%)         |
| Bottled water                                                   | 0 (0.0%)          |
| Refused to say                                                  | 6 (0.1%)          |
| <b>Toilet</b>                                                   |                   |
| Own flush toilet                                                | 21 (0.4%)         |
| Flush toilet shared with another household                      | 12 (0.2%)         |
| Own ventilated improved pit latrine                             | 628 (12.5%)       |
| Own pit latrine with slab                                       | 1,993 (39.8%)     |

| <b>Characteristic</b>                     | <b>N = 5,008</b> |
|-------------------------------------------|------------------|
| Open pit latrine                          | 179 (3.6%)       |
| Composting toilet                         | 68 (1.4%)        |
| None/Bush/Field                           | 1,959 (39.1%)    |
| Pit latrine shared with another household | 141 (2.8%)       |
| Refused to say                            | 7 (0.1%)         |
| <b>Electricity available</b>              | 663 (13.2%)      |
| <b>Cooking fuel</b>                       |                  |
| Electricity                               | 106 (2.1%)       |
| LPG                                       | 208 (4.2%)       |
| Biogas                                    | 29 (0.6%)        |
| Paraffin                                  | 147 (2.9%)       |
| Wood                                      | 4,210 (84.1%)    |
| Coal                                      | 4 (0.1%)         |
| Straw, shrubs, grass                      | 16 (0.3%)        |
| Animal dung                               | 286 (5.7%)       |
| Refused to say                            | 2 (0.0%)         |
| <b>Heating fuel</b>                       |                  |
| Electricity                               | 68 (1.4%)        |
| Gas                                       | 41 (0.8%)        |
| Paraffin                                  | 323 (6.4%)       |
| Wood                                      | 3,198 (63.9%)    |
| Coal                                      | 23 (0.5%)        |
| Animal dung                               | 1,308 (26.1%)    |
| Crop waste                                | 13 (0.3%)        |
| Refused to say                            | 34 (0.7%)        |
| <b>People per bedroom</b>                 |                  |
| 1-2                                       | 2,527 (50.5%)    |
| 3-4                                       | 1,880 (37.5%)    |
| 5 or more                                 | 599 (12.0%)      |
| Other / unknown / refused to say          | 2 (0.0%)         |
| <b>Wall material</b>                      |                  |
| Mud                                       | 3,099 (61.9%)    |
| Mud and cement                            | 1,042 (20.8%)    |
| Corrugated iron                           | 230 (4.6%)       |
| Bare brick                                | 245 (4.9%)       |
| Finished / plaster                        | 348 (6.9%)       |
| Other                                     | 42 (0.8%)        |
| Refused to say                            | 2 (0.0%)         |
| <b>Roof material</b>                      |                  |
| Natural                                   | 3,099 (61.9%)    |
| Rudimentary (wood planks, cardboard)      | 242 (4.8%)       |

| <b>Characteristic</b>                                                                | <b>N = 5,008</b> |
|--------------------------------------------------------------------------------------|------------------|
| Finished (metal, corrugated, wood, asbestos, ceramic / clay tiles, roofing shingles) | 1,548 (30.9%)    |
| Other                                                                                | 116 (2.3%)       |
| Refused to say                                                                       | 3 (0.1%)         |
| <b>Floor material</b>                                                                |                  |
| Earth                                                                                | 2,511 (50.1%)    |
| Wood planks                                                                          | 30 (0.6%)        |
| Cement                                                                               | 1,462 (29.2%)    |
| Vinyl tiles                                                                          | 203 (4.1%)       |
| Ceramic tiles                                                                        | 232 (4.6%)       |
| Carpet                                                                               | 549 (11.0%)      |
| Other                                                                                | 19 (0.4%)        |
| Refused to say                                                                       | 2 (0.0%)         |
| <b>Agricultural land ownership</b>                                                   | 3,127 (62.4%)    |
| <b>Clock</b>                                                                         | 1,059 (21.1%)    |
| <b>Water pump</b>                                                                    | 83 (1.7%)        |
| <b>Grain grinder</b>                                                                 | 700 (14.0%)      |
| <b>Sewing machine</b>                                                                | 1,093 (21.8%)    |
| <b>Color TV</b>                                                                      | 1,827 (36.5%)    |
| <b>Black/white TV</b>                                                                | 1,620 (32.3%)    |
| <b>Video player / DVD player</b>                                                     | 212 (4.2%)       |
| <b>Tape player / CD player</b>                                                       | 150 (3.0%)       |
| <b>Camera, video camera</b>                                                          | 39 (0.8%)        |
| <b>Refrigerator</b>                                                                  | 259 (5.2%)       |
| <b>Freezer</b>                                                                       | 66 (1.3%)        |
| <b>Washing machine</b>                                                               | 12 (0.2%)        |
| <b>Dishwasher</b>                                                                    | 7 (0.1%)         |
| <b>Electric or gas stove</b>                                                         | 1,063 (21.2%)    |
| <b>Kerosene stove</b>                                                                | 1,878 (37.5%)    |
| <b>Mobile phone</b>                                                                  | 2,767 (55.3%)    |
| <b>Car</b>                                                                           | 135 (2.7%)       |
| <b>Bicycle</b>                                                                       | 26 (0.5%)        |
| <b>Landline or fix phone</b>                                                         | 21 (0.4%)        |
| <b>Cattle</b>                                                                        | 0 (0, 2)         |
| <b>Horses</b>                                                                        | 0 (0, 0)         |
| <b>Donkeys</b>                                                                       | 0 (0, 1)         |
| <b>Sheep</b>                                                                         | 0 (0, 7)         |
| <b>Goats</b>                                                                         | 0 (0, 0)         |
| <b>Chickens</b>                                                                      | 0 (0, 5)         |
| <b>Pigs</b>                                                                          | 0 (0, 0)         |
| <b>Rabbits</b>                                                                       | 0 (0, 0)         |

| Characteristic                                                                                                                                      | N = 5,008 |
|-----------------------------------------------------------------------------------------------------------------------------------------------------|-----------|
| <sup>1</sup> Collected in Lesotho Loti, converted using the bilateral conversion rate on May 31, 2024 [62]                                          |           |
| <sup>2</sup> Salaries and wages of household members or other people (i.e. of family members living outside the household)                          |           |
| <sup>3</sup> Defined as needing to cross a mountain or river or travel >10 km to the nearest health facility.                                       |           |
| <sup>4</sup> Defined as at least one household member not being able to consult a healthcare provider despite needing it during the last 12 months. |           |
| <sup>5</sup> Defined as at least one household member experiencing difficulties obtaining required medication.                                      |           |

*Supplementary table 1 Overview of all collected household level socioeconomic indicators. IQR: interquartile range*

| <b>Characteristic</b>                                          | <b>Female, n(%)</b><br>4560 (58%) | <b>Male, n(%)</b><br>3314 (42%) | <b>Total, n(%)</b><br>7874 (100%) |
|----------------------------------------------------------------|-----------------------------------|---------------------------------|-----------------------------------|
| <b>Age (years), median (IQR)</b>                               | 41 (27, 60)                       | 39 (28, 54)                     | 40 (27, 58)                       |
| 18-39 years                                                    | 2,148 (47.1%)                     | 1,662 (50.2%)                   | 3,810 (48.4%)                     |
| 40-64 years                                                    | 1,529 (33.5%)                     | 1,185 (35.8%)                   | 2,714 (34.5%)                     |
| ≥65 years                                                      | 883 (19.4%)                       | 467 (14.1%)                     | 1,350 (17.1%)                     |
| <b>District</b>                                                |                                   |                                 |                                   |
| Butha-Buthe                                                    | 2,283 (50.1%)                     | 1,592 (48.0%)                   | 3,875 (49.2%)                     |
| Mokhotlong                                                     | 2,277 (49.9%)                     | 1,722 (52.0%)                   | 3,999 (50.8%)                     |
| <b>Relationship status</b>                                     |                                   |                                 |                                   |
| Single                                                         | 655 (14.4%)                       | 902 (27.2%)                     | 1,557 (19.8%)                     |
| In a committed relationship                                    | 2,690 (59.0%)                     | 2,024 (61.1%)                   | 4,714 (59.9%)                     |
| Separated or divorced                                          | 87 (1.9%)                         | 123 (3.7%)                      | 210 (2.7%)                        |
| Widowed                                                        | 1,119 (24.5%)                     | 245 (7.4%)                      | 1,364 (17.3%)                     |
| Unknown/refused to say                                         | 9 (0.2%)                          | 20 (0.6%)                       | 29 (0.4%)                         |
| <b>Education</b>                                               |                                   |                                 |                                   |
| No schooling                                                   | 276 (6.1%)                        | 684 (20.7%)                     | 960 (12.2%)                       |
| Primary school                                                 | 2,623 (57.5%)                     | 1,879 (56.7%)                   | 4,502 (57.2%)                     |
| Secondary/high school                                          | 1,448 (31.8%)                     | 624 (18.8%)                     | 2,072 (26.3%)                     |
| Tertiary/higher/post high school                               | 209 (4.6%)                        | 121 (3.7%)                      | 330 (4.2%)                        |
| Unknown/refused to say                                         | 3 (0.1%)                          | 4 (0.1%)                        | 7 (0.1%)                          |
| Missing                                                        | 1                                 | 2                               | 3                                 |
| <b>Work status</b>                                             |                                   |                                 |                                   |
| Working for pay                                                | 444 (9.7%)                        | 572 (17.3%)                     | 1,016 (12.9%)                     |
| Self-employed                                                  | 703 (15.4%)                       | 709 (21.4%)                     | 1,412 (17.9%)                     |
| Working on own plot or looking after livestock                 | 469 (10.3%)                       | 1,075 (32.4%)                   | 1,544 (19.6%)                     |
| Helping another family member with their business, without pay | 33 (0.7%)                         | 30 (0.9%)                       | 63 (0.8%)                         |
| Full-time student                                              | 90 (2.0%)                         | 38 (1.1%)                       | 128 (1.6%)                        |
| Homemaker (looking after children/others/home)                 | 1,734 (38.0%)                     | 184 (5.6%)                      | 1,918 (24.4%)                     |
| Long term sick or disabled                                     | 53 (1.2%)                         | 41 (1.2%)                       | 94 (1.2%)                         |
| Retired                                                        | 205 (4.5%)                        | 136 (4.1%)                      | 341 (4.3%)                        |
| Unemployed                                                     | 702 (15.4%)                       | 461 (13.9%)                     | 1,163 (14.8%)                     |
| Unknown/refused to say                                         | 127 (2.8%)                        | 68 (2.1%)                       | 195 (2.5%)                        |
| <b>Body mass index (kg/m<sup>2</sup>)</b>                      |                                   |                                 |                                   |
| Underweight (<18.5)                                            | 250 (5.5%)                        | 383 (11.7%)                     | 633 (8.1%)                        |
| Normal weight (18.5–24.9)                                      | 1,678 (37.2%)                     | 2,165 (66.1%)                   | 3,843 (49.4%)                     |
| Overweight (25.0-29.9)                                         | 1,323 (29.3%)                     | 548 (16.7%)                     | 1,871 (24.0%)                     |
| Obese (≥30)                                                    | 1,259 (27.9%)                     | 181 (5.5%)                      | 1,440 (18.5%)                     |
| Missing                                                        | 50                                | 37                              | 87                                |
| <b>Abdominal circumference (cm)</b>                            | 86 (78, 97)                       | 80 (75, 87)                     | 83 (76, 93)                       |
| Missing                                                        | 400                               | 368                             | 768                               |

| Characteristic                                                 | Female, n(%)<br>4560 (58%) | Male, n(%)<br>3314 (42%) | Total, n(%)<br>7874 (100%) |
|----------------------------------------------------------------|----------------------------|--------------------------|----------------------------|
| <b>Physical activity</b>                                       |                            |                          |                            |
| Low physical activity                                          | 625 (13.8%)                | 360 (11.0%)              | 985 (12.6%)                |
| Moderate physical activity                                     | 701 (15.5%)                | 345 (10.5%)              | 1,046 (13.4%)              |
| High physical activity                                         | 3,201 (70.7%)              | 2,575 (78.5%)            | 5,776 (74.0%)              |
| Missing                                                        | 33                         | 34                       | 67                         |
| <b>Fruit intake (servings/day)</b>                             |                            |                          |                            |
|                                                                | 0.14 (0.00, 0.86)          | 0.14 (0.00, 0.86)        | 0.14 (0.00, 0.86)          |
| Missing                                                        | 1                          | 2                        | 3                          |
| <b>Vegetable intake (servings/day)</b>                         |                            |                          |                            |
|                                                                | 1.14 (0.57, 2.14)          | 0.86 (0.29, 2.00)        | 1.00 (0.43, 2.00)          |
| Missing                                                        | 1                          | 2                        | 3                          |
| <b>Portions of vegetables and fruits/day</b>                   |                            |                          |                            |
| <5                                                             | 4,043 (88.7%)              | 2,962 (89.4%)            | 7,005 (89.0%)              |
| ≥5                                                             | 516 (11.3%)                | 350 (10.6%)              | 866 (11.0%)                |
| Missing                                                        | 1                          | 2                        | 3                          |
| <b>Adding salt during cooking</b>                              |                            |                          |                            |
| Always                                                         | 3,008 (66.0%)              | 2,226 (67.2%)            | 5,234 (66.5%)              |
| Often                                                          | 130 (2.9%)                 | 123 (3.7%)               | 253 (3.2%)                 |
| Sometimes                                                      | 773 (17.0%)                | 523 (15.8%)              | 1,296 (16.5%)              |
| Rarely                                                         | 509 (11.2%)                | 360 (10.9%)              | 869 (11.0%)                |
| Never                                                          | 131 (2.9%)                 | 68 (2.1%)                | 199 (2.5%)                 |
| Unknown/refused to say                                         | 8 (0.2%)                   | 12 (0.4%)                | 20 (0.3%)                  |
| Missing                                                        | 1                          | 2                        | 3                          |
| <b>Adding salt while eating</b>                                |                            |                          |                            |
| Always                                                         | 631 (13.8%)                | 523 (15.8%)              | 1,154 (14.7%)              |
| Often                                                          | 206 (4.5%)                 | 219 (6.6%)               | 425 (5.4%)                 |
| Sometimes                                                      | 1,295 (28.4%)              | 1,028 (31.0%)            | 2,323 (29.5%)              |
| Rarely                                                         | 1,246 (27.3%)              | 1,011 (30.5%)            | 2,257 (28.7%)              |
| Never                                                          | 1,175 (25.8%)              | 521 (15.7%)              | 1,696 (21.5%)              |
| Unknown/refused to say                                         | 6 (0.1%)                   | 10 (0.3%)                | 16 (0.2%)                  |
| Missing                                                        | 1                          | 2                        | 3                          |
| <b>Importance of lowering salt intake</b>                      |                            |                          |                            |
| Very important                                                 | 4,000 (87.7%)              | 2,697 (81.4%)            | 6,697 (85.1%)              |
| Somewhat important                                             | 145 (3.2%)                 | 164 (5.0%)               | 309 (3.9%)                 |
| Not at all important                                           | 110 (2.4%)                 | 133 (4.0%)               | 243 (3.1%)                 |
| Unknown/refused to say                                         | 304 (6.7%)                 | 318 (9.6%)               | 622 (7.9%)                 |
| Missing                                                        | 1                          | 2                        | 3                          |
| <b>Perceiving high salt intake as potential health problem</b> |                            |                          |                            |
| Yes                                                            | 3,775 (82.8%)              | 2,504 (75.6%)            | 6,279 (79.8%)              |
| No                                                             | 519 (11.4%)                | 502 (15.2%)              | 1,021 (13.0%)              |
| Unknown/refused to say                                         | 265 (5.8%)                 | 306 (9.2%)               | 571 (7.3%)                 |
| Missing                                                        | 1                          | 2                        | 3                          |

| Characteristic                            | Female, n(%)<br>4560 (58%) | Male, n(%)<br>3314 (42%) | Total, n(%)<br>7874 (100%) |
|-------------------------------------------|----------------------------|--------------------------|----------------------------|
| <b>Eating processed food high in salt</b> |                            |                          |                            |
| Always                                    | 380 (8.3%)                 | 298 (9.0%)               | 678 (8.6%)                 |
| Often                                     | 217 (4.8%)                 | 223 (6.7%)               | 440 (5.6%)                 |
| Sometimes                                 | 1,460 (32.0%)              | 1,048 (31.6%)            | 2,508 (31.9%)              |
| Rarely                                    | 1,921 (42.1%)              | 1,383 (41.8%)            | 3,304 (42.0%)              |
| Never                                     | 560 (12.3%)                | 346 (10.4%)              | 906 (11.5%)                |
| Unknown/refused to say                    | 21 (0.5%)                  | 14 (0.4%)                | 35 (0.4%)                  |
| Missing                                   | 1                          | 2                        | 3                          |
| <b>Perceived quantity of salt intake</b>  |                            |                          |                            |
| Far too much                              | 86 (1.9%)                  | 78 (2.4%)                | 164 (2.1%)                 |
| Too much                                  | 193 (4.2%)                 | 186 (5.6%)               | 379 (4.8%)                 |
| Just the right amount                     | 2,879 (63.1%)              | 2,108 (63.6%)            | 4,987 (63.4%)              |
| Too little                                | 1,177 (25.8%)              | 786 (23.7%)              | 1,963 (24.9%)              |
| Far too little                            | 140 (3.1%)                 | 63 (1.9%)                | 203 (2.6%)                 |
| Unknown/refused to say                    | 84 (1.8%)                  | 91 (2.7%)                | 175 (2.2%)                 |
| Missing                                   | 1                          | 2                        | 3                          |
| <b>Fruit juices</b>                       |                            |                          |                            |
| None per week                             | 2,745 (60.2%)              | 2,172 (65.6%)            | 4,917 (62.5%)              |
| One to two times a week                   | 1,458 (32.0%)              | 942 (28.4%)              | 2,400 (30.5%)              |
| Three to four times a week                | 225 (4.9%)                 | 105 (3.2%)               | 330 (4.2%)                 |
| Five or more times a week                 | 118 (2.6%)                 | 78 (2.4%)                | 196 (2.5%)                 |
| Refused to say                            | 13 (0.3%)                  | 15 (0.5%)                | 28 (0.4%)                  |
| Missing                                   | 1                          | 2                        | 3                          |
| <b>Fizzy sugar sweetened beverages</b>    |                            |                          |                            |
| None per week                             | 3,169 (69.5%)              | 2,115 (63.9%)            | 5,284 (67.1%)              |
| One to two times a week                   | 1,227 (26.9%)              | 1,020 (30.8%)            | 2,247 (28.5%)              |
| Three to four times a week                | 122 (2.7%)                 | 131 (4.0%)               | 253 (3.2%)                 |
| Five or more times a week                 | 23 (0.5%)                  | 32 (1.0%)                | 55 (0.7%)                  |
| Refused to say                            | 18 (0.4%)                  | 14 (0.4%)                | 32 (0.4%)                  |
| Missing                                   | 1                          | 2                        | 3                          |
| <b>Candy</b>                              |                            |                          |                            |
| None per week                             | 2,506 (55.0%)              | 2,082 (62.9%)            | 4,588 (58.3%)              |
| One to two times a week                   | 1,624 (35.6%)              | 971 (29.3%)              | 2,595 (33.0%)              |
| Three to four times a week                | 299 (6.6%)                 | 174 (5.3%)               | 473 (6.0%)                 |
| Five or more times a week                 | 115 (2.5%)                 | 70 (2.1%)                | 185 (2.4%)                 |
| Refused to say                            | 15 (0.3%)                  | 15 (0.5%)                | 30 (0.4%)                  |
| Missing                                   | 1                          | 2                        | 3                          |
| <b>Biscuits</b>                           |                            |                          |                            |
| None per week                             | 3,215 (70.5%)              | 2,454 (74.1%)            | 5,669 (72.0%)              |
| One to two times a week                   | 1,135 (24.9%)              | 707 (21.3%)              | 1,842 (23.4%)              |

| <b>Characteristic</b>                         | <b>Female, n(%)</b><br>4560 (58%) | <b>Male, n(%)</b><br>3314 (42%) | <b>Total, n(%)</b><br>7874 (100%) |
|-----------------------------------------------|-----------------------------------|---------------------------------|-----------------------------------|
| Three to four times a week                    | 140 (3.1%)                        | 107 (3.2%)                      | 247 (3.1%)                        |
| Five or more times a week                     | 55 (1.2%)                         | 28 (0.8%)                       | 83 (1.1%)                         |
| Refused to say                                | 14 (0.3%)                         | 16 (0.5%)                       | 30 (0.4%)                         |
| Missing                                       | 1                                 | 2                               | 3                                 |
| <b>Chocolate</b>                              |                                   |                                 |                                   |
| None per week                                 | 3,767 (82.6%)                     | 2,796 (84.4%)                   | 6,563 (83.4%)                     |
| One to two times a week                       | 671 (14.7%)                       | 427 (12.9%)                     | 1,098 (13.9%)                     |
| Three to four times a week                    | 87 (1.9%)                         | 57 (1.7%)                       | 144 (1.8%)                        |
| Five or more times a week                     | 20 (0.4%)                         | 17 (0.5%)                       | 37 (0.5%)                         |
| Refused to say                                | 14 (0.3%)                         | 15 (0.5%)                       | 29 (0.4%)                         |
| Missing                                       | 1                                 | 2                               | 3                                 |
| <b>Crisps</b>                                 |                                   |                                 |                                   |
| None per week                                 | 2,072 (45.4%)                     | 1,760 (53.1%)                   | 3,832 (48.7%)                     |
| One to two times a week                       | 1,847 (40.5%)                     | 1,178 (35.6%)                   | 3,025 (38.4%)                     |
| Three to four times a week                    | 456 (10.0%)                       | 258 (7.8%)                      | 714 (9.1%)                        |
| Five or more times a week                     | 168 (3.7%)                        | 103 (3.1%)                      | 271 (3.4%)                        |
| Refused to say                                | 16 (0.4%)                         | 13 (0.4%)                       | 29 (0.4%)                         |
| Missing                                       | 1                                 | 2                               | 3                                 |
| <b>Fries/chips</b>                            |                                   |                                 |                                   |
| None per week                                 | 3,036 (66.6%)                     | 2,232 (67.4%)                   | 5,268 (66.9%)                     |
| One to two times a week                       | 1,254 (27.5%)                     | 884 (26.7%)                     | 2,138 (27.2%)                     |
| Three to four times a week                    | 204 (4.5%)                        | 134 (4.0%)                      | 338 (4.3%)                        |
| Five or more times a week                     | 50 (1.1%)                         | 47 (1.4%)                       | 97 (1.2%)                         |
| Refused to say                                | 15 (0.3%)                         | 15 (0.5%)                       | 30 (0.4%)                         |
| Missing                                       | 1                                 | 2                               | 3                                 |
| <b>Makoonya (traditional fried bread bun)</b> |                                   |                                 |                                   |
| None per week                                 | 2,260 (49.6%)                     | 1,638 (49.5%)                   | 3,898 (49.5%)                     |
| One to two times a week                       | 1,802 (39.5%)                     | 1,350 (40.8%)                   | 3,152 (40.0%)                     |
| Three to four times a week                    | 366 (8.0%)                        | 218 (6.6%)                      | 584 (7.4%)                        |
| Five or more times a week                     | 117 (2.6%)                        | 92 (2.8%)                       | 209 (2.7%)                        |
| Refused to say                                | 14 (0.3%)                         | 14 (0.4%)                       | 28 (0.4%)                         |
| Missing                                       | 1                                 | 2                               | 3                                 |
| <b>Meat</b>                                   |                                   |                                 |                                   |
| None per week                                 | 1,952 (42.8%)                     | 1,303 (39.3%)                   | 3,255 (41.4%)                     |
| One to two times a week                       | 2,024 (44.4%)                     | 1,481 (44.7%)                   | 3,505 (44.5%)                     |
| Three to four times a week                    | 458 (10.0%)                       | 388 (11.7%)                     | 846 (10.7%)                       |
| Five or more times a week                     | 110 (2.4%)                        | 128 (3.9%)                      | 238 (3.0%)                        |
| Refused to say                                | 15 (0.3%)                         | 12 (0.4%)                       | 27 (0.3%)                         |
| Missing                                       | 1                                 | 2                               | 3                                 |
| <b>Smoking status</b>                         |                                   |                                 |                                   |

| <b>Characteristic</b>                               | <b>Female, n(%)</b><br>4560 (58%) | <b>Male, n(%)</b><br>3314 (42%) | <b>Total, n(%)</b><br>7874 (100%) |
|-----------------------------------------------------|-----------------------------------|---------------------------------|-----------------------------------|
| Current Smoker                                      | 1,015 (22.3%)                     | 1,579 (47.9%)                   | 2,594 (33.1%)                     |
| Never Smoker                                        | 3,500 (77.0%)                     | 1,657 (50.2%)                   | 5,157 (65.8%)                     |
| Ex-smoker quit smoking less than 5 years ago        | 21 (0.5%)                         | 35 (1.1%)                       | 56 (0.7%)                         |
| Ex-smoker quit smoking 5 years ago or longer        | 8 (0.2%)                          | 28 (0.8%)                       | 36 (0.5%)                         |
| Missing                                             | 16                                | 15                              | 31                                |
| <b>Frequency of alcohol consumption</b>             |                                   |                                 |                                   |
| Every day/ 7 days per week                          | 71 (1.6%)                         | 158 (4.8%)                      | 229 (2.9%)                        |
| 5 to 6 days per week                                | 43 (0.9%)                         | 102 (3.1%)                      | 145 (1.8%)                        |
| 3 to 4 days per week                                | 93 (2.0%)                         | 183 (5.5%)                      | 276 (3.5%)                        |
| 1 to 2 days per week                                | 287 (6.3%)                        | 505 (15.3%)                     | 792 (10.1%)                       |
| 1 to 3 days per month                               | 139 (3.1%)                        | 245 (7.4%)                      | 384 (4.9%)                        |
| Less than 1 to 3 days per month                     | 180 (4.0%)                        | 195 (5.9%)                      | 375 (4.8%)                        |
| Never                                               | 3,729 (82.1%)                     | 1,914 (58.0%)                   | 5,643 (71.9%)                     |
| Missing                                             | 18                                | 12                              | 30                                |
| <b>First-degree relative with hypertension</b>      | 976 (21.4%)                       | 374 (11.3%)                     | 1,350 (17.1%)                     |
| <b>First-degree relative with diabetes</b>          | 257 (5.6%)                        | 90 (2.7%)                       | 347 (4.4%)                        |
| <b>History of myocardial infarction</b>             | 62 (1.4%)                         | 11 (0.3%)                       | 73 (0.9%)                         |
| <b>History of chronic kidney disease</b>            | 16 (0.4%)                         | 5 (0.2%)                        | 21 (0.3%)                         |
| <b>Current or previous TB diagnosis</b>             | 169 (3.7%)                        | 238 (7.2%)                      | 407 (5.2%)                        |
| <b>Severe vision impairment/blindness</b>           | 35 (0.8%)                         | 7 (0.2%)                        | 42 (0.5%)                         |
| <b>Peripheral arterial disease</b>                  | 27 (0.6%)                         | 5 (0.2%)                        | 32 (0.4%)                         |
| <b>Heart failure</b>                                | 32 (0.7%)                         | 5 (0.2%)                        | 37 (0.5%)                         |
| <b>History of stroke</b>                            | 20 (0.4%)                         | 13 (0.4%)                       | 33 (0.4%)                         |
| <b>History of neuropathy</b>                        | 39 (0.9%)                         | 8 (0.2%)                        | 47 (0.6%)                         |
| <b>Chronic lung disease (COPD/asthma)</b>           | 16 (0.4%)                         | 11 (0.3%)                       | 27 (0.3%)                         |
| <b>Diabetic foot syndrome</b>                       | 6 (0.1%)                          | 1 (0.0%)                        | 7 (0.1%)                          |
| <b>Self-reported HIV status</b>                     |                                   |                                 |                                   |
| HIV positive                                        | 782 (17.1%)                       | 406 (12.3%)                     | 1,188 (15.1%)                     |
| Tested negative ≤ 12 months ago                     | 2,435 (53.4%)                     | 1,503 (45.4%)                   | 3,938 (50.0%)                     |
| Tested negative > 12 months ago                     | 846 (18.6%)                       | 684 (20.6%)                     | 1,530 (19.4%)                     |
| Unknown                                             | 453 (9.9%)                        | 695 (21.0%)                     | 1,148 (14.6%)                     |
| Refused to say                                      | 44 (1.0%)                         | 26 (0.8%)                       | 70 (0.9%)                         |
| <b>ART intake among those HIV positive (n=1188)</b> |                                   |                                 |                                   |
| Yes                                                 | 771 (98.6%)                       | 398 (98.0%)                     | 1,169 (98.4%)                     |
| No                                                  | 11 (1.4%)                         | 8 (2.0%)                        | 19 (1.6%)                         |
| Missing                                             | 3,778                             | 2,908                           | 6,686                             |
| <b>Lipid lowering medication</b>                    |                                   |                                 |                                   |
| Yes                                                 | 17 (0.4%)                         | 3 (0.1%)                        | 20 (0.3%)                         |
| No                                                  | 4,543 (99.6%)                     | 3,311 (99.9%)                   | 7,854 (99.7%)                     |
| <b>Aspirine</b>                                     |                                   |                                 |                                   |

| <b>Characteristic</b> | <b>Female, n(%)</b> | <b>Male, n(%)</b> | <b>Total, n(%)</b> |
|-----------------------|---------------------|-------------------|--------------------|
|                       | 4560 (58%)          | 3314 (42%)        | 7874 (100%)        |
| Yes                   | 386 (8.5%)          | 103 (3.1%)        | 489 (6.2%)         |
| No                    | 4,174 (91.5%)       | 3,211 (96.9%)     | 7,385 (93.8%)      |

*Supplementary table 2 Overview of complete individual level demographic, clinical and behavioural risk factor data of adult participants.*
